# Supplementary material for: Potential Health Risk Associated with Mycotoxins in Oat Grains Consumed in Spain
Source: MDPI journal article supplement (doi:10.3390/toxins13060421), 2021-06-13
Supplement: s1 [file s1]

# Supplementary Materials: Potential Health Risk Associated with Mycotoxins in Oat Grains Consumed in Spain

Andrea Tarazona, José Vicente Gómez, Fernando Mateo, Misericordia Jiménez and Eva María Mateo

**Table S1.** Optimized MS/MS parameters, quantitative daughter ion (Q) and assistant qualifier daughter ion (q) used.

| Myco-toxin         | Elemental formula                                 | Base mass (Dalton) | Precursor ion (m/z) (Dalton) | Product ions (m/z) (Dalton)         | Cone voltage (V)   | Collision energy (eV) |
|--------------------|---------------------------------------------------|--------------------|------------------------------|-------------------------------------|--------------------|-----------------------|
| ZEA                | C <sub>18</sub> H <sub>22</sub> O <sub>5</sub>    | 318.147            | 319.0                        | [M + H] <sup>+</sup>                | 187.0 <sup>1</sup> | 20                    |
|                    |                                                   |                    |                              |                                     | 185.0 <sup>2</sup> | 25                    |
| DON                | C <sub>15</sub> H <sub>20</sub> O <sub>6</sub>    | 296.126            | 297.0                        | [M + H] <sup>+</sup>                | 231.0 <sup>1</sup> | 20                    |
|                    |                                                   |                    |                              |                                     | 249.5 <sup>2</sup> | 15                    |
| 3-ADON/<br>15-ADON | C <sub>17</sub> H <sub>22</sub> O <sub>7</sub>    | 338.137            | 339.1                        | [M + H] <sup>+</sup>                | 231.0 <sup>1</sup> | 35                    |
|                    |                                                   |                    |                              |                                     | 203.2 <sup>2</sup> | 35                    |
| HT-2 toxin         | C <sub>22</sub> H <sub>32</sub> O <sub>8</sub>    | 424.210            | 442.0                        | [M + NH <sub>4</sub> ] <sup>+</sup> | 263.0 <sup>1</sup> | 20                    |
|                    |                                                   |                    |                              |                                     | 215.0 <sup>2</sup> | 20                    |
| T-2 toxin          | C <sub>24</sub> H <sub>34</sub> O <sub>9</sub>    | 466.5              | 484.0                        | [M + NH <sub>4</sub> ] <sup>+</sup> | 305.4 <sup>1</sup> | 20                    |
|                    |                                                   |                    |                              |                                     | 245.2 <sup>2</sup> | 20                    |
| FB <sub>1</sub>    | C <sub>34</sub> H <sub>59</sub> NO <sub>15</sub>  | 721.388            | 723.0                        | [M + H] <sup>+</sup>                | 334.0 <sup>1</sup> | 50                    |
|                    |                                                   |                    |                              |                                     | 352.0 <sup>2</sup> | 50                    |
| FB <sub>2</sub>    | C <sub>34</sub> H <sub>59</sub> NO <sub>14</sub>  | 705.394            | 706.0                        | [M + H] <sup>+</sup>                | 336.0 <sup>1</sup> | 50                    |
|                    |                                                   |                    |                              |                                     | 354.3 <sup>2</sup> | 50                    |
| AFB <sub>1</sub>   | C <sub>17</sub> H <sub>12</sub> O <sub>6</sub>    | 312.063            | 313.0                        | [M + H] <sup>+</sup>                | 285.0 <sup>1</sup> | 70                    |
|                    |                                                   |                    |                              |                                     | 241.0 <sup>2</sup> | 70                    |
| AFB <sub>2</sub>   | C <sub>17</sub> H <sub>14</sub> O <sub>6</sub>    | 314.079            | 315.0                        | [M + H] <sup>+</sup>                | 287.0 <sup>1</sup> | 70                    |
|                    |                                                   |                    |                              |                                     | 259.0 <sup>2</sup> | 70                    |
| AFG <sub>1</sub>   | C <sub>17</sub> H <sub>12</sub> O <sub>7</sub>    | 328.058            | 329.0                        | [M + H] <sup>+</sup>                | 243.0 <sup>1</sup> | 70                    |
|                    |                                                   |                    |                              |                                     | 283.0 <sup>2</sup> | 70                    |
| AFG <sub>2</sub>   | C <sub>17</sub> H <sub>14</sub> O <sub>7</sub>    | 330.074            | 331.0                        | [M + H] <sup>+</sup>                | 257.0 <sup>1</sup> | 70                    |
|                    |                                                   |                    |                              |                                     | 285.2 <sup>2</sup> | 70                    |
| OTA                | C <sub>20</sub> H <sub>18</sub> ClNO <sub>6</sub> | 403.082            | 404.0                        | [M + H] <sup>+</sup>                | 239.1 <sup>1</sup> | 25                    |
|                    |                                                   |                    |                              |                                     | 221.2 <sup>2</sup> | 40                    |

<sup>1</sup>: Quantifier ion (Q); <sup>2</sup>: Assistant qualifier ion (q).

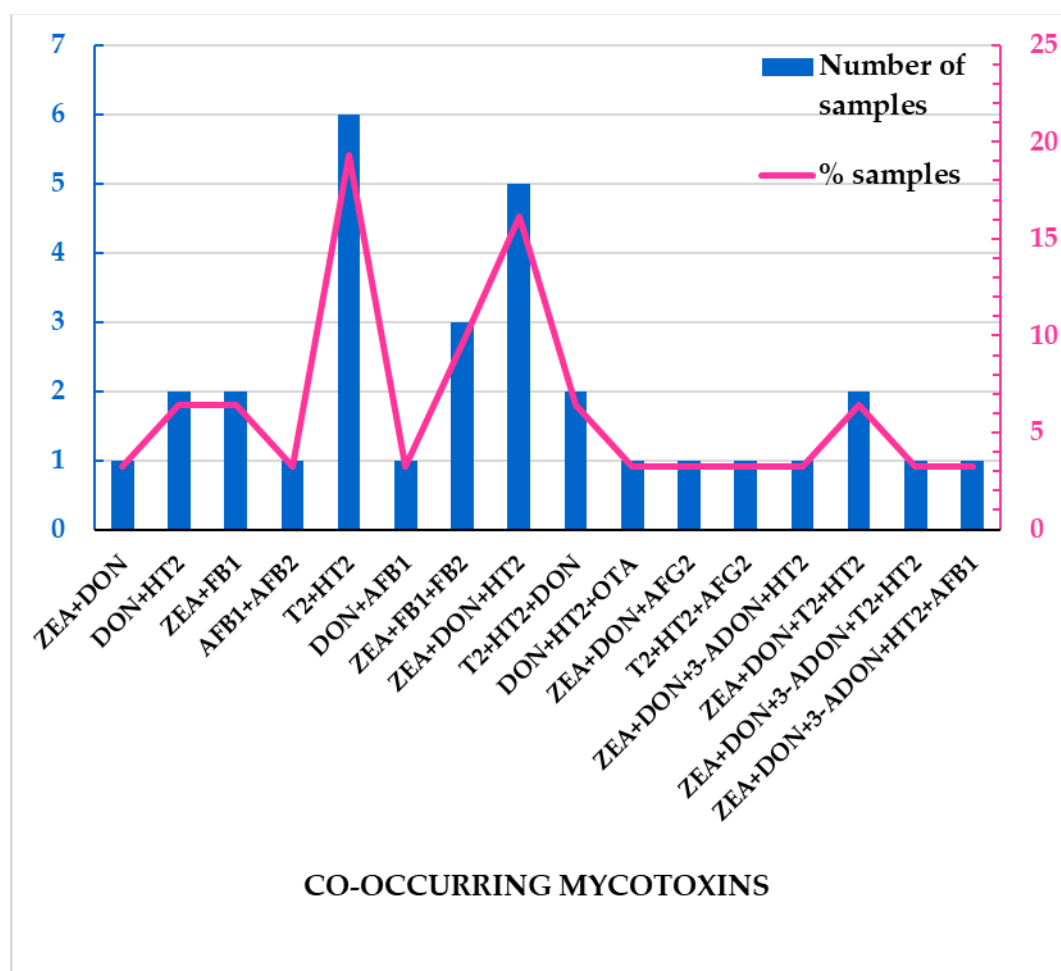

**Figure S1.** Number of analyzed oat samples with co-occurrence of mycotoxins (all  $\geq$  LOQ) in the period 2015–2019 (left axis) and percentage of samples over the 31 samples where co-occurrence was detected (right axis).
